# Supplementary material for: Circulating Neutrophils Do Not Predict Subclinical Coronary Artery Disease in Women with Former Preeclampsia
Source: MDPI journal article supplement (doi:10.3390/cells9020468), 2020-02-18
Supplement: s1 [file s1]

## Supplemental material

**Supplemental table 1: Flow cytometry antibodies**

| Marker | Alternative name | Fluorochrome   | Clone  | Supplier        | Amount (µl) |
|--------|------------------|----------------|--------|-----------------|-------------|
| CD182  | CXCR2            | AF488          | 5E8    | Biolegend       | 0.5         |
| CD35   | CR1 or C3b/C4b   | PE             | E11    | BD biosciences  | 5           |
| CD16   | FcγRIII          | ECD            | 3G8    | Beckman Coulter | 0.5         |
| CD14   |                  | RPE/Cy7        | Rmo52  | Beckman Coulter | 2.5         |
| CD66b  | CEACAM8          | APC            | 80H3   | Beckman Coulter | 1           |
| CD62L  | L-selectin       | AF700          | DREG56 | BD biosciences  | 0.5         |
| CD11b  | CR3A             | APC-eFluor 780 | ICRF44 | eBioscience     | 2.5         |
| CD184  | CXCR4            | BV421          | 12G5   | BD biosciences  | 5           |
| CD9    | TSP-29           | BV510          | M-L13  | BD biosciences  | 5           |

CD indicates cluster of differentiation; CXCR, C-X-C motif receptor; CR, complement receptor; FcγR, Fc gamma receptor; CEACAM, carcinoembryonic antigen-related cell adhesion molecules; TSP-29, tetraspanin protein 29; AF, Alexa Fluor; PE, (R-) phycoerythrin; ECD, phycoerythrin-Texas Red conjugate (energy coupled dye); RPE/Cy7, (R-) Phycoerythrin: Cy-7 Tandem Conjugate; APC, Allophycocyanin; BV, Brilliant Violet.

**Supplemental table 2**

|        | % cells    | CAC              |                  | <i>p</i> | MFI        | CAC              |                  | <i>p</i> |
|--------|------------|------------------|------------------|----------|------------|------------------|------------------|----------|
|        |            | No (n=57)        | Yes (n=33)       |          |            | No (n=57)        | Yes (n=33)       |          |
| CD35+  | Resting    | 1.9 [1.1-3.4]    | 1.7 [1.0-3.2]    | 0.60     | Resting    | 8.2 [8.0-8.4]    | 8.2 [8.0-8.5]    | 0.79     |
|        | Stimulated | 97.0 [93.7-98.5] | 97.5 [91.4-98.9] | 0.79     | Stimulated | 15.2 [13.7-16.4] | 14.8 [13.0-16.6] | 0.72     |
| CD11B+ | Resting    | 1.3 [0.7-2.6]    | 0.9 [0.5-1.5]    | 0.16     | Resting    | 10.8 [10.5-11.2] | 10.6 [10.5-10.9] | 0.39     |
|        | Stimulated | 99.8 [99.3-99.8] | 99.7 [99.4-99.8] | 0.64     | Stimulated | 29.4 [25.2-32.8] | 27.9 [23.8-32.1] | 0.39     |
| CD66B+ | Resting    | 0.9 [0.4-1.9]    | 1.0 [0.6-2.7]    | 0.20     | Resting    | 20.2 [19.9-20.5] | 20.1 [19.9-20.3] | 0.21     |
|        | Stimulated | 49.2 [42.6-60.0] | 54.2 [42.8-64.1] | 0.41     | Stimulated | 24.6 [23.4-26.2] | 25.2 [23.4-26.4] | 0.80     |
| CD62L- | Resting    | 1.4 [0.5-2.1]    | 0.7 [0.4-3.0]    | 0.50     | Resting    | 7.2 [4.8-7.9]    | 7.1 [5.1-7.8]    | 0.89     |
|        | Stimulated | 56.9 [48.2-64.7] | 54.2 [46.8-64.0] | 0.25     | Stimulated | 2.1 [1.9-2.4]    | 2.0 [1.8-2.6]    | 0.72     |

**Supplemental table 2 - Neutrophil activity in women with a history of PE with or without CAC.** Neutrophil activity is shown as the percentage or the MFI of cells positive for CD35, CD11B or CD66B and negative for CD62L while resting and upon stimulation with fMLF. Neutrophil activity was not different between women with and without CAC. CAC indicates coronary artery calcification, defined as >0 Agatston Units.

Supplemental table 3

| Luminal stenosis |            |                     |                  |                  |             | Luminal stenosis |                     |                  |                  |             |
|------------------|------------|---------------------|------------------|------------------|-------------|------------------|---------------------|------------------|------------------|-------------|
| % cells          | 0% (n=46)  | >0% >50 %<br>(n=35) | ≥50% (n=9)       | p                | MFI         | 0 % (n=46)       | >0% >50 %<br>(n=35) | ≥50% (n=9)       | p                |             |
| CD35+            | Resting    | 1.9 [1.1-4.0]       | 1.7 [1.2-3.2]    | 1.2 [0.9-2.2]    | 0.79        | Resting          | 8.2 [8.0-8.4]       | 8.2 [7.9-8.4]    | 8.2 [8.0-8.6]    | 0.99        |
|                  | Stimulated | 97.1 [93.5-98.7]    | 97.5 [93.2-98.8] | 94.2 [90.0-96.9] | 0.32        | Stimulated       | 15.3 [13.7-16.8]    | 15.4 [13.7-16.8] | 12.8 [12.1-14.6] | <b>0.03</b> |
| CD11B+           | Resting    | 1.4 [0.7-2.5]       | 0.9 [0.5-1.5]    | 1.3 [0.4-5.1]    | 0.14        | Resting          | 10.8 [10.5-11.0]    | 10.8 [10.5-11.1] | 10.6 [10.5-10.8] | 0.74        |
|                  | Stimulated | 99.8 [99.5-99.8]    | 99.7 [99.2-99.8] | 99.6 [99.5-99.8] | 0.48        | Stimulated       | 29.7 [25.3-32.8]    | 28.6 [24.4-31.5] | 24.6 [22.7-29.6] | 0.31        |
| CD66B+           | Resting    | 0.9 [0.5-1.9]       | 1.0 [0.6-2.1]    | 0.9 [0.6-3.6]    | 0.67        | Resting          | 20.2 [19.9-20.5]    | 20.1 [19.8-20.3] | 20.2 [20.1-20.4] | 0.16        |
|                  | Stimulated | 48.9 [44.1-59.8]    | 57.4 [41.7-64.2] | 47.5 [41.7-51.6] | 0.42        | Stimulated       | 24.5 [23.4-26.1]    | 25.5 [23.5-26.7] | 23.6 [23.1-24.5] | 0.16        |
| CD62L-           | Resting    | 1.4 [0.5-2.1]       | 1.2 [0.4-2.5]    | 0.7 [0.5-2.6]    | 0.70        | Resting          | 6.4 [4.8-7.8]       | 7.2 [4.6-7.9]    | 7.6 [6.8-8.0]    | 0.41        |
|                  | Stimulated | 58.1 [49.1-65.4]    | 51.5 [46.0-56.9] | 64.4 [55.2-67.1] | <b>0.01</b> | Stimulated       | 2.2 [1.9-2.4]       | 2.0 [1.8-2.2]    | 2.4 [2.0-2.7]    | 0.08        |

**Supplemental table 3 – Association of neutrophil activity to degree of luminal coronary stenosis.** Neutrophil activity is shown as the percentage or the MFI of cells positive for CD35, CD11B or CD66B and negative for CD62L while resting and upon stimulation with fMLF. In women with ≥50% coronary stenosis, the neutrophil CD35 surface expression (MFI) was lower upon stimulation with fMLF. A similar trend was observed for degranulation marker CD11B, but not for CD66B and CD62L. Indicated *p*-values were calculated with the Kruskal-Wallis test.

**Supplemental table 4**

|         |            | Subclinical CAD  |                  |          |            |                  | Subclinical CAD  |             |  |
|---------|------------|------------------|------------------|----------|------------|------------------|------------------|-------------|--|
| % cells |            | No (n=78)        | Yes (n=12)       | <i>p</i> | MFI        | No (n=78)        | Yes (n=12)       | <i>p</i>    |  |
| CD35+   | Resting    | 1.9 [1.1-3.3]    | 1.2 [1.0-2.6]    | 0.56     | Resting    | 8.2 [8.0-8.4]    | 8.2 [7.9-8.5]    | 0.98        |  |
|         | Stimulated | 97.3 [93.3-98.8] | 95.4 [91.8-97.8] | 0.17     | Stimulated | 15.3 [13.7-17.0] | 13.7 [12.5-14.8] | <b>0.03</b> |  |
| CD11B+  | Resting    | 1.1 [0.7-2.0]    | 1.0 [0.5-2.3]    | 0.66     | Resting    | 10.8 [10.5-11.1] | 10.6 [10.5-10.9] | 0.57        |  |
|         | Stimulated | 99.8 [99.4-99.8] | 99.7 [99.5-99.8] | 1.00     | Stimulated | 29.2 [25.1-32.8] | 26.0 [23.2-29.9] | 0.29        |  |
| CD66B+  | Resting    | 0.9 [0.5-1.9]    | 1.1 [0.6-3.1]    | 0.32     | Resting    | 20.2 [19.9-20.4] | 20.1 [19.9-20.2] | 0.97        |  |
|         | Stimulated | 50.8 [42.5-63.0] | 49.7 [44.9-60.0] | 0.88     | Stimulated | 24.8 [23.4-26.6] | 24.1 [23.2-25.2] | 0.32        |  |
| CD62L-  | Resting    | 1.3 [0.4-2.4]    | 0.6 [0.4-2.8]    | 0.32     | Resting    | 7.2 [4.7-7.9]    | 6.9 [6.2-7.8]    | 0.66        |  |
|         | Stimulated | 56.1 [48.2-64.5] | 57.4 [47.6-65.7] | 0.79     | Stimulated | 2.1 [1.9-2.4]    | 2.0 [1.8-2.6]    | 0.92        |  |

**Supplemental table 4 – Association of neutrophil activity with subclinical CAD.** Neutrophil activity is shown as the percentage or the MFI of cells positive for CD35, CD11B or CD66B and negative for CD62L while resting and upon stimulation with fMLF. In women with subclinical CAD, the neutrophil CD35 surface expression (MFI) was lower upon stimulation with fMLF. A similar trend was observed for degranulation marker CD11B, but not for CD66B and CD62L. CAD indicates subclinical coronary artery disease defined as  $\geq 100$  Agatston Units and/or  $\geq 50$  % stenosis. Indicated *p*-values are derived from the Mann-Whitney *U* test.
